# Supplementary material for: A rapid and sensitive colorimetric sensor for hypochlorite detection based on polyvinylpyrrolidone-stabilized gold nanoparticles
Source: Royal Society of Chemistry journal article supplement (doi:10.1039/d3ay01400b), 2023-01-01
Supplement: d3ay01400b1.pdf [file d3ay01400b1.pdf]

## Electronic Supplementary Information

### **Rapid and sensitive colorimetric sensor for hypochlorite detection based on polyvinylpyrrolidone-stabilized gold nanoparticles**

Yingjie Ye,<sup>a</sup> Qian zhang,<sup>a</sup> Yongxing Zhang<sup>\*b</sup>, Yue Li,<sup>a</sup> Fengxian Gao,<sup>a</sup> Dong Ma,<sup>b</sup> Shun Lu<sup>\*c</sup>

<sup>a</sup> School of Materials and Chemical Engineering, Henan University of Engineering, Zhengzhou, Henan 451191, China

<sup>b</sup> Anhui Province Key Laboratory of Pollutant Sensitive Materials and Environmental Remediation, Department of Materials Science & Engineering, Huaibei Normal University, Huaibei 235000, China

<sup>c</sup> Chongqing Institute of Green and Intelligent Technology, Chinese Academy of Sciences, Chongqing 400714, China

\*Corresponding authors: [zyx07157@mail.ustc.edu.cn](mailto:zyx07157@mail.ustc.edu.cn) (Y. Zhang); [lushun@cigit.ac.cn](mailto:lushun@cigit.ac.cn) (S. Lu)

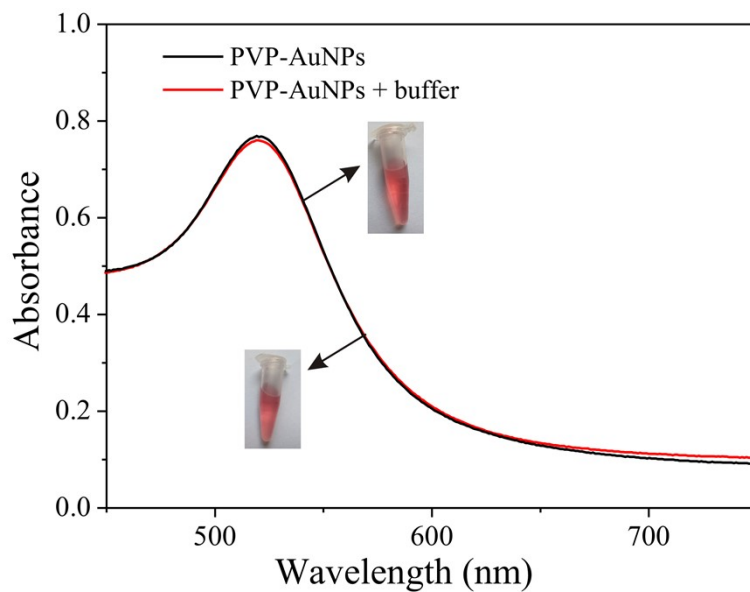

**Figure S1.** UV-vis spectra of 800  $\mu\text{L}$  PVP-AuNPs + 200  $\mu\text{L}$   $\text{H}_2\text{O}$  and 800  $\mu\text{L}$  PVP-AuNPs with the addition of 200  $\mu\text{L}$  mixtures of buffer (50 mM; pH 4.5).

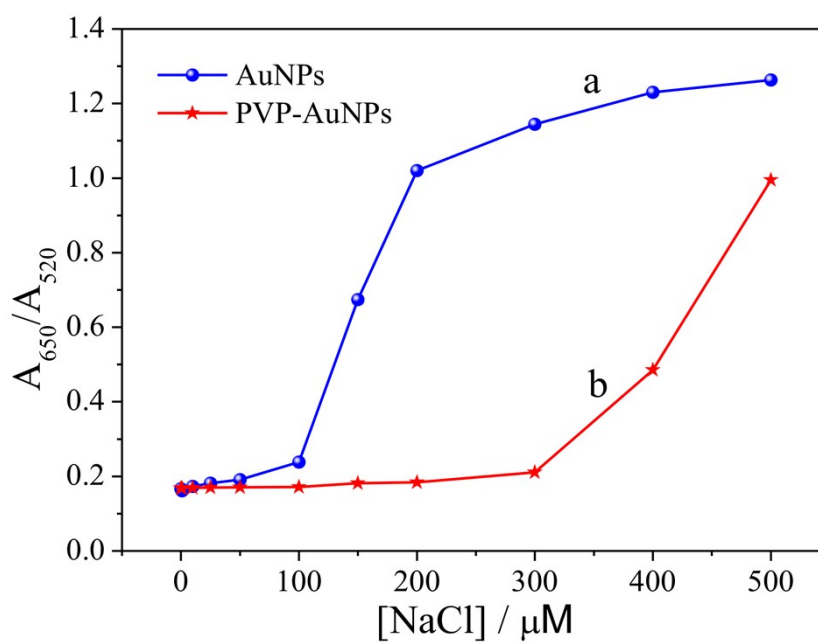

**Figure S2.** (a) Absorbance ratio of AuNPs (800  $\mu\text{L}$ ) after adding different concentrations of NaCl (200  $\mu\text{L}$ ). (b) Absorbance ratio of PVP-AuNPs with various amounts of NaCl. Conditions: 800  $\mu\text{L}$  PVP-AuNPs + 200  $\mu\text{L}$  NaCl. The amount of PVP contained in the PVP-AuNPs nanodispersion is 0.025%.

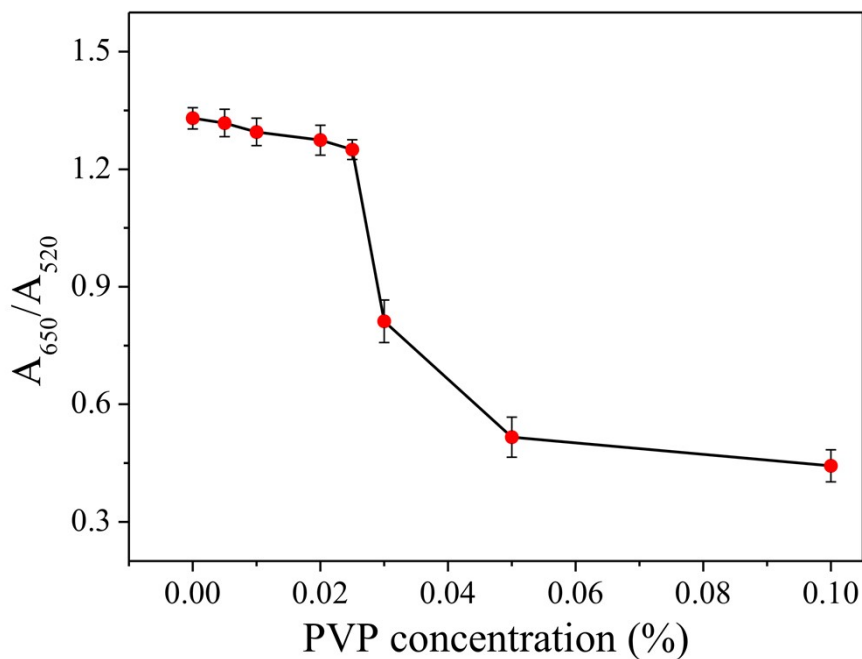

**Figure S3.** Effect of PVP concentration on the absorbance ratio of AuNPs (800  $\mu$ L) added with 200  $\mu$ L of the mixtures of buffer (75 mM) and cysteine (20  $\mu$ M). The concentrations of PVP in the AuNPs were 0, 0.005%, 0.01%, 0.02%, 0.025%, 0.03%, 0.05% and 0.1%, respectively. Error bars derived from a set of three experiments.

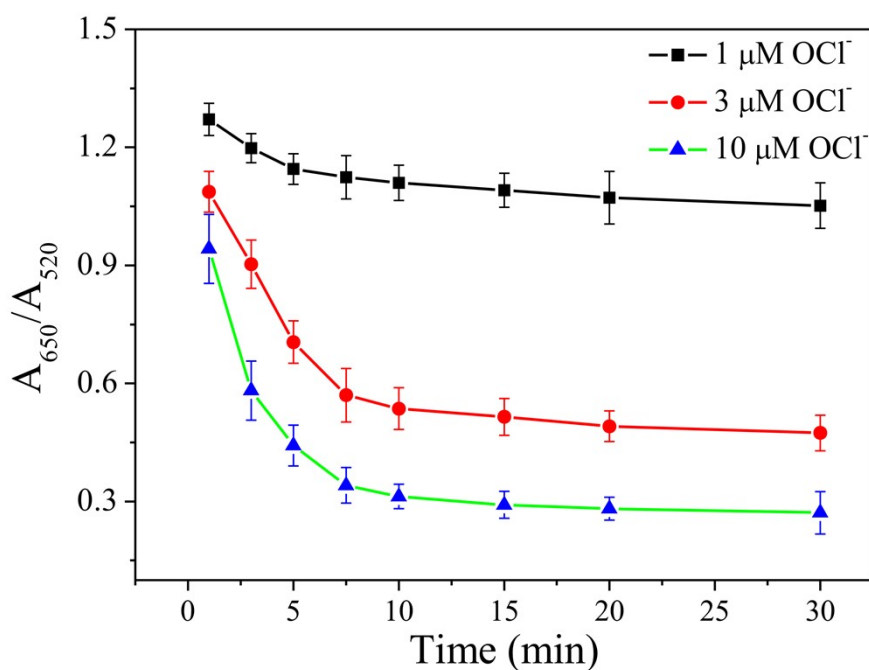

**Figure S4.** Absorbance ratios of PVP-AuNPs after the addition of cysteine (20  $\mu$ M) and  $\text{OCl}^-$  (1  $\mu$ M; 3  $\mu$ M; 10  $\mu$ M) mixture solutions in buffer at different reaction time.

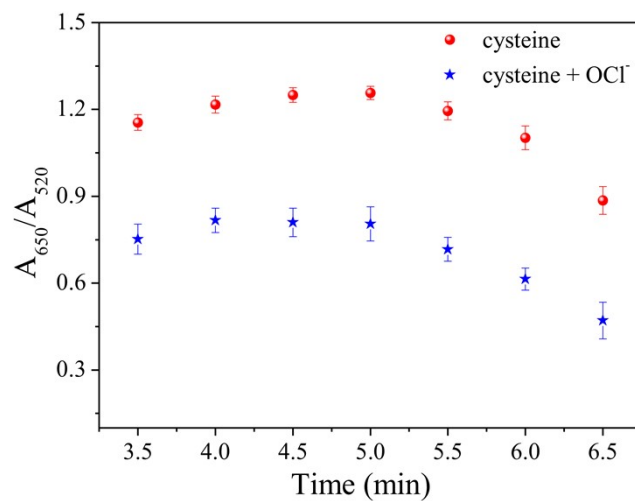

**Figure S5.** Effect of pH on the value of  $A_{650}/A_{520}$  of the PVP-AuNPs-based detection system in the absence and presence of  $3 \mu\text{M } OCl^-$ .

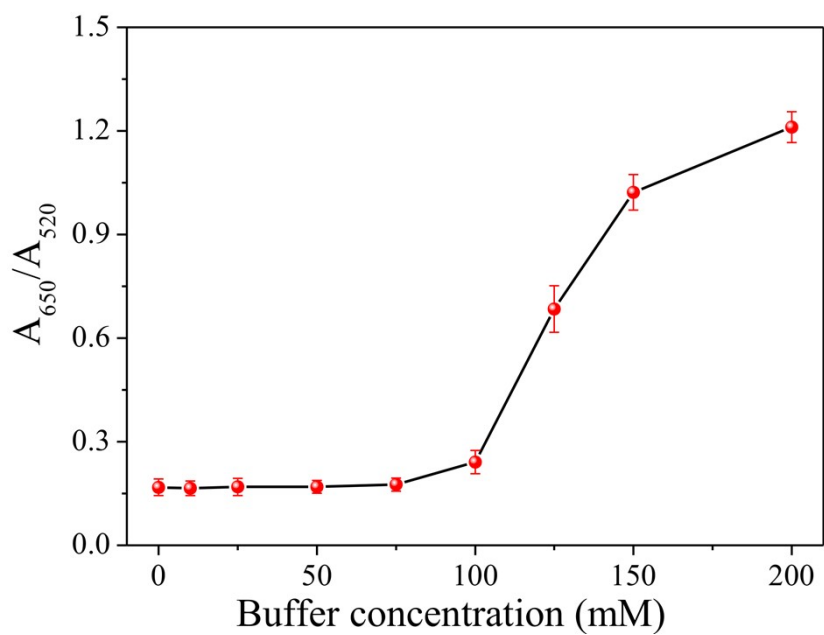

**Figure S6.**  $A_{650}/A_{520}$  values of the PVP-AuNPs solutions as a function of buffer concentration.
